# Supplementary material
Source: publisher figshare collection journal article supplement (https://frontiersin.figshare.com/ndownloader/files/28347723)
Supplement: Supplementary file 1 [file 28347723]

Supplementary Material

1. **Supplementary figures and tables**

**1.1 Supplementary table**

Copepod species identified in 24 samples collected at the sampling station in Daya Bay during Sept.30-Oct.2, 2014.

| Order | Species |
| --- | --- |
| Calanoida (16) | *Acartia erythraea, Acartia spinicauda*, *Acrocalanus gibber*, *Acrocalanus gracilis, Acrocalanus longicornis*, *Canthocalanus pauper*, *Centropages furcatus*, *Centropages tenuiremis*, *Eucalanus subcrassus*, *Gaetanus minor*, *Paracalanus parvus,* *Parvocalanus crassirostris*, *Subeucalanus mucronatus*, *Temora discaudata*, *Temora stylifera*, *Temora turbinata,* |
| Cyclopoida  (7) | *Corycaeus affinis*, *Corycaeus dahli*, *Corycaeus speciosus*, *Oncaea conifera*, *Oithona nana*, *Oithona brevicornis*, *Oithona similis* |
| Harpacticoida  (2) | *Euterpe acutifrons, Euterpina acutifrons* |
